# Supplementary material for: Management of Inflammatory Arthritis in pregnancy: a National Cross-Sectional Survey of Canadian rheumatologists
Source: PubMed Central journal article supplement (PMC6530147; doi:10.1186/s41927-019-0065-8), 2019-05-17
Supplement: 41927_2019_65_MOESM1_ESM.pdf [file 41927_2019_65_MOESM1_ESM.pdf]

**Additional file 1.** Rheumatologist Survey on the Management of Inflammatory Arthritis in Pregnancy.\*

**1. How would you describe your practice setting?**

- Solo community practice
- Group community practice
- Clinical trials research facility associated with community practice
- Academic/teaching hospital
- Other, please specify...

**2. What is your gender?**

- Male
- Female

**3. In what province do you practice?**

- AB
- BC
- MB
- NB
- NL
- NT
- NS
- NU
- ON
- PE
- QC
- SK
- YT

**4. What percentage of your time do you spend seeing patients?**

- <25%
- 25-50%
- 51-75%
- >75%

\*The questionnaire was distributed over 8 screens, which included the study information and consent page. Respondents were able to review and change their answers prior to submission.

5. **How many years have you practiced rheumatology?**
- Currently in a residency or fellowship training program
  - ≤1 to 5 years
  - 6 to 10 years
  - 11 to 20 years
  - >20 years
6. **What proportion of your patients have inflammatory arthritis?**
- <25%
  - 25-50%
  - 51-75%
  - >75%
7. **What proportion of your inflammatory arthritis patients are women of childbearing age?**
- 0%
  - 1-25%
  - 26-50%
  - 51-75%
  - >75%
8. **Do you send patients considering pregnancy or those who are pregnant to an “expert” colleague?**
- Yes
  - No
9. **Do you follow your inflammatory arthritis patients during pregnancy?**
- Yes
  - No

**10. How safe do you think the following drugs are during pregnancy?**

|              | Safe throughout pregnancy | Safe during certain trimesters | Not safe at all | Not sure |
|--------------|---------------------------|--------------------------------|-----------------|----------|
| Ibuprofen    | [ ]                       | [ ]                            | [ ]             | [ ]      |
| Naproxen     | [ ]                       | [ ]                            | [ ]             | [ ]      |
| Celecoxib    | [ ]                       | [ ]                            | [ ]             | [ ]      |
| Other NSAIDs | [ ]                       | [ ]                            | [ ]             | [ ]      |

**11. How safe do you think the following conventional DMARDs are during pregnancy?**

|                       | Safe throughout pregnancy | Safe during certain trimesters | Not safe at all | Not sure |
|-----------------------|---------------------------|--------------------------------|-----------------|----------|
| Azathioprine          | [ ]                       | [ ]                            | [ ]             | [ ]      |
| Chloroquine           | [ ]                       | [ ]                            | [ ]             | [ ]      |
| Cyclophosphamide      | [ ]                       | [ ]                            | [ ]             | [ ]      |
| Cyclosporine          | [ ]                       | [ ]                            | [ ]             | [ ]      |
| Doxycycline           | [ ]                       | [ ]                            | [ ]             | [ ]      |
| Gold Salts            | [ ]                       | [ ]                            | [ ]             | [ ]      |
| Hydroxychloroquine    | [ ]                       | [ ]                            | [ ]             | [ ]      |
| Leflunomide           | [ ]                       | [ ]                            | [ ]             | [ ]      |
| Methotrexate          | [ ]                       | [ ]                            | [ ]             | [ ]      |
| Minocycline           | [ ]                       | [ ]                            | [ ]             | [ ]      |
| Mycophenolate mofetil | [ ]                       | [ ]                            | [ ]             | [ ]      |
| Sulfasalazine         | [ ]                       | [ ]                            | [ ]             | [ ]      |

**12. How safe do you think the following biologic DMARDs/small molecules are during pregnancy?**

|              | Safe throughout pregnancy | Safe during certain trimesters | Not safe at all | Not sure |
|--------------|---------------------------|--------------------------------|-----------------|----------|
| Abatacept    | [ ]                       | [ ]                            | [ ]             | [ ]      |
| Adalimumab   | [ ]                       | [ ]                            | [ ]             | [ ]      |
| Anakinra     | [ ]                       | [ ]                            | [ ]             | [ ]      |
| Apremilast   | [ ]                       | [ ]                            | [ ]             | [ ]      |
| Certolizumab | [ ]                       | [ ]                            | [ ]             | [ ]      |
| Etanercept   | [ ]                       | [ ]                            | [ ]             | [ ]      |
| Golimumab    | [ ]                       | [ ]                            | [ ]             | [ ]      |
| Infliximab   | [ ]                       | [ ]                            | [ ]             | [ ]      |
| Rituximab    | [ ]                       | [ ]                            | [ ]             | [ ]      |
| Tocilizumab  | [ ]                       | [ ]                            | [ ]             | [ ]      |
| Tofacitinib  | [ ]                       | [ ]                            | [ ]             | [ ]      |
| Ustekinumab  | [ ]                       | [ ]                            | [ ]             | [ ]      |

**13. Which, if any, of the following drugs do you stop in the inflammatory arthritis patient planning pregnancy?**

|              | Stop | May continue | Not sure |
|--------------|------|--------------|----------|
| Ibuprofen    | [ ]  | [ ]          | [ ]      |
| Naproxen     | [ ]  | [ ]          | [ ]      |
| Celecoxib    | [ ]  | [ ]          | [ ]      |
| Other NSAIDs | [ ]  | [ ]          | [ ]      |

**14. Your inflammatory arthritis patient is planning pregnancy. How long before conception do you advise the discontinuation of the following drugs?**

|              | 1-2 wks | 1 mo | 3 mo | 6 mo | Do not stop | Not sure |
|--------------|---------|------|------|------|-------------|----------|
| Ibuprofen    | [ ]     | [ ]  | [ ]  | [ ]  | [ ]         | [ ]      |
| Naproxen     | [ ]     | [ ]  | [ ]  | [ ]  | [ ]         | [ ]      |
| Celecoxib    | [ ]     | [ ]  | [ ]  | [ ]  | [ ]         | [ ]      |
| Other NSAIDs | [ ]     | [ ]  | [ ]  | [ ]  | [ ]         | [ ]      |
| Prednisone   | [ ]     | [ ]  | [ ]  | [ ]  | [ ]         | [ ]      |

**15. Which, if any, of the following conventional DMARDs do you stop in the inflammatory arthritis patient planning pregnancy?**

|                       | Stop | May continue | Not sure |
|-----------------------|------|--------------|----------|
| Azathioprine          | [ ]  | [ ]          | [ ]      |
| Chloroquine           | [ ]  | [ ]          | [ ]      |
| Cyclophosphamide      | [ ]  | [ ]          | [ ]      |
| Cyclosporine          | [ ]  | [ ]          | [ ]      |
| Doxycycline           | [ ]  | [ ]          | [ ]      |
| Gold Salts            | [ ]  | [ ]          | [ ]      |
| Hydroxychloroquine    | [ ]  | [ ]          | [ ]      |
| Leflunomide           | [ ]  | [ ]          | [ ]      |
| Methotrexate          | [ ]  | [ ]          | [ ]      |
| Minocycline           | [ ]  | [ ]          | [ ]      |
| Mycophenolate mofetil | [ ]  | [ ]          | [ ]      |
| Sulfasalazine         | [ ]  | [ ]          | [ ]      |

**16. Your inflammatory arthritis patient is planning pregnancy. How long before conception do you advise the discontinuation of the following conventional DMARDs?**

|                       | 1-2 mo | 3 mo | 6 mo | 1 yr | ≥2 yrs | Do not stop | Pregnancy not rec'd at this | Not sure |
|-----------------------|--------|------|------|------|--------|-------------|-----------------------------|----------|
| Azathioprine          | [ ]    | [ ]  | [ ]  | [ ]  | [ ]    | [ ]         | [ ]                         | [ ]      |
| Chloroquine           | [ ]    | [ ]  | [ ]  | [ ]  | [ ]    | [ ]         | [ ]                         | [ ]      |
| Cyclophosphamide      | [ ]    | [ ]  | [ ]  | [ ]  | [ ]    | [ ]         | [ ]                         | [ ]      |
| Cyclosporine          | [ ]    | [ ]  | [ ]  | [ ]  | [ ]    | [ ]         | [ ]                         | [ ]      |
| Doxycycline           | [ ]    | [ ]  | [ ]  | [ ]  | [ ]    | [ ]         | [ ]                         | [ ]      |
| Gold Salts            | [ ]    | [ ]  | [ ]  | [ ]  | [ ]    | [ ]         | [ ]                         | [ ]      |
| Hydroxychloroquine    | [ ]    | [ ]  | [ ]  | [ ]  | [ ]    | [ ]         | [ ]                         | [ ]      |
| Leflunomide           | [ ]    | [ ]  | [ ]  | [ ]  | [ ]    | [ ]         | [ ]                         | [ ]      |
| Methotrexate          | [ ]    | [ ]  | [ ]  | [ ]  | [ ]    | [ ]         | [ ]                         | [ ]      |
| Minocycline           | [ ]    | [ ]  | [ ]  | [ ]  | [ ]    | [ ]         | [ ]                         | [ ]      |
| Mycophenolate mofetil | [ ]    | [ ]  | [ ]  | [ ]  | [ ]    | [ ]         | [ ]                         | [ ]      |
| Sulfasalazine         | [ ]    | [ ]  | [ ]  | [ ]  | [ ]    | [ ]         | [ ]                         | [ ]      |

17. Your inflammatory arthritis patient chooses to continue with her conventional DMARDs while attempting to conceive and is now 6 weeks pregnant. When would you advise discontinuation of the following conventional DMARDs?

|                       | Estimated gestational age of 5-6 weeks | End of 1 <sup>st</sup> trimester | End of 2 <sup>nd</sup> trimester | At 32 weeks' gestation | Continue, do not stop | Counsel regarding termination | Not sure |
|-----------------------|----------------------------------------|----------------------------------|----------------------------------|------------------------|-----------------------|-------------------------------|----------|
| Azathioprine          | [ ]                                    | [ ]                              | [ ]                              | [ ]                    | [ ]                   | [ ]                           | [ ]      |
| Chloroquine           | [ ]                                    | [ ]                              | [ ]                              | [ ]                    | [ ]                   | [ ]                           | [ ]      |
| Cyclophosphamide      | [ ]                                    | [ ]                              | [ ]                              | [ ]                    | [ ]                   | [ ]                           | [ ]      |
| Cyclosporine          | [ ]                                    | [ ]                              | [ ]                              | [ ]                    | [ ]                   | [ ]                           | [ ]      |
| Doxycycline           | [ ]                                    | [ ]                              | [ ]                              | [ ]                    | [ ]                   | [ ]                           | [ ]      |
| Gold Salts            | [ ]                                    | [ ]                              | [ ]                              | [ ]                    | [ ]                   | [ ]                           | [ ]      |
| Hydroxychloroquine    | [ ]                                    | [ ]                              | [ ]                              | [ ]                    | [ ]                   | [ ]                           | [ ]      |
| Leflunomide           | [ ]                                    | [ ]                              | [ ]                              | [ ]                    | [ ]                   | [ ]                           | [ ]      |
| Methotrexate          | [ ]                                    | [ ]                              | [ ]                              | [ ]                    | [ ]                   | [ ]                           | [ ]      |
| Minocycline           | [ ]                                    | [ ]                              | [ ]                              | [ ]                    | [ ]                   | [ ]                           | [ ]      |
| Mycophenolate mofetil | [ ]                                    | [ ]                              | [ ]                              | [ ]                    | [ ]                   | [ ]                           | [ ]      |
| Sulfasalazine         | [ ]                                    | [ ]                              | [ ]                              | [ ]                    | [ ]                   | [ ]                           | [ ]      |

18. Which, if any, of the following biologic DMARDs/small molecules do you stop in the inflammatory arthritis patient planning pregnancy?

|              | Stop | May continue | Not sure |
|--------------|------|--------------|----------|
| Abatacept    | [ ]  | [ ]          | [ ]      |
| Adalimumab   | [ ]  | [ ]          | [ ]      |
| Anakinra     | [ ]  | [ ]          | [ ]      |
| Apremilast   | [ ]  | [ ]          | [ ]      |
| Certolizumab | [ ]  | [ ]          | [ ]      |
| Etanercept   | [ ]  | [ ]          | [ ]      |
| Golimumab    | [ ]  | [ ]          | [ ]      |
| Infliximab   | [ ]  | [ ]          | [ ]      |
| Rituximab    | [ ]  | [ ]          | [ ]      |
| Tocilizumab  | [ ]  | [ ]          | [ ]      |
| Tofacitinib  | [ ]  | [ ]          | [ ]      |
| Ustekinumab  | [ ]  | [ ]          | [ ]      |

19. Your inflammatory arthritis patient is planning pregnancy. How long before conception do you advise the discontinuation of the following biologic DMARDs/small molecules?

|              | 1 wks                    | 2 wks                    | 4 wks                    | 8 wks                    | 12 wks                   | 6 mo                     | 1 yr                     | Do not stop              | Not sure                 |
|--------------|--------------------------|--------------------------|--------------------------|--------------------------|--------------------------|--------------------------|--------------------------|--------------------------|--------------------------|
| Abatacept    | <input type="checkbox"/> | <input type="checkbox"/> | <input type="checkbox"/> | <input type="checkbox"/> | <input type="checkbox"/> | <input type="checkbox"/> | <input type="checkbox"/> | <input type="checkbox"/> | <input type="checkbox"/> |
| Adalimumab   | <input type="checkbox"/> | <input type="checkbox"/> | <input type="checkbox"/> | <input type="checkbox"/> | <input type="checkbox"/> | <input type="checkbox"/> | <input type="checkbox"/> | <input type="checkbox"/> | <input type="checkbox"/> |
| Anakinra     | <input type="checkbox"/> | <input type="checkbox"/> | <input type="checkbox"/> | <input type="checkbox"/> | <input type="checkbox"/> | <input type="checkbox"/> | <input type="checkbox"/> | <input type="checkbox"/> | <input type="checkbox"/> |
| Apremilast   | <input type="checkbox"/> | <input type="checkbox"/> | <input type="checkbox"/> | <input type="checkbox"/> | <input type="checkbox"/> | <input type="checkbox"/> | <input type="checkbox"/> | <input type="checkbox"/> | <input type="checkbox"/> |
| Certolizumab | <input type="checkbox"/> | <input type="checkbox"/> | <input type="checkbox"/> | <input type="checkbox"/> | <input type="checkbox"/> | <input type="checkbox"/> | <input type="checkbox"/> | <input type="checkbox"/> | <input type="checkbox"/> |
| Etanercept   | <input type="checkbox"/> | <input type="checkbox"/> | <input type="checkbox"/> | <input type="checkbox"/> | <input type="checkbox"/> | <input type="checkbox"/> | <input type="checkbox"/> | <input type="checkbox"/> | <input type="checkbox"/> |
| Golimumab    | <input type="checkbox"/> | <input type="checkbox"/> | <input type="checkbox"/> | <input type="checkbox"/> | <input type="checkbox"/> | <input type="checkbox"/> | <input type="checkbox"/> | <input type="checkbox"/> | <input type="checkbox"/> |
| Infliximab   | <input type="checkbox"/> | <input type="checkbox"/> | <input type="checkbox"/> | <input type="checkbox"/> | <input type="checkbox"/> | <input type="checkbox"/> | <input type="checkbox"/> | <input type="checkbox"/> | <input type="checkbox"/> |
| Rituximab    | <input type="checkbox"/> | <input type="checkbox"/> | <input type="checkbox"/> | <input type="checkbox"/> | <input type="checkbox"/> | <input type="checkbox"/> | <input type="checkbox"/> | <input type="checkbox"/> | <input type="checkbox"/> |
| Tocilizumab  | <input type="checkbox"/> | <input type="checkbox"/> | <input type="checkbox"/> | <input type="checkbox"/> | <input type="checkbox"/> | <input type="checkbox"/> | <input type="checkbox"/> | <input type="checkbox"/> | <input type="checkbox"/> |
| Tofacitinib  | <input type="checkbox"/> | <input type="checkbox"/> | <input type="checkbox"/> | <input type="checkbox"/> | <input type="checkbox"/> | <input type="checkbox"/> | <input type="checkbox"/> | <input type="checkbox"/> | <input type="checkbox"/> |
| Ustekinumab  | <input type="checkbox"/> | <input type="checkbox"/> | <input type="checkbox"/> | <input type="checkbox"/> | <input type="checkbox"/> | <input type="checkbox"/> | <input type="checkbox"/> | <input type="checkbox"/> | <input type="checkbox"/> |

20. Your inflammatory arthritis patient chooses to continue with her biologic DMARDs and small molecules while attempting to conceive and is now 6 weeks pregnant. When would you advise discontinuation of the following biologic DMARDs/small molecules?

|              | Estimated gestational age of 5-6 weeks | End 1 <sup>st</sup> trimester | End 2 <sup>nd</sup> trimester | 1-4 wks prior to delivery | Do not stop              | Disagree: stop before conception | Not sure                 |
|--------------|----------------------------------------|-------------------------------|-------------------------------|---------------------------|--------------------------|----------------------------------|--------------------------|
| Abatacept    | <input type="checkbox"/>               | <input type="checkbox"/>      | <input type="checkbox"/>      | <input type="checkbox"/>  | <input type="checkbox"/> | <input type="checkbox"/>         | <input type="checkbox"/> |
| Adalimumab   | <input type="checkbox"/>               | <input type="checkbox"/>      | <input type="checkbox"/>      | <input type="checkbox"/>  | <input type="checkbox"/> | <input type="checkbox"/>         | <input type="checkbox"/> |
| Anakinra     | <input type="checkbox"/>               | <input type="checkbox"/>      | <input type="checkbox"/>      | <input type="checkbox"/>  | <input type="checkbox"/> | <input type="checkbox"/>         | <input type="checkbox"/> |
| Apremilast   | <input type="checkbox"/>               | <input type="checkbox"/>      | <input type="checkbox"/>      | <input type="checkbox"/>  | <input type="checkbox"/> | <input type="checkbox"/>         | <input type="checkbox"/> |
| Certolizumab | <input type="checkbox"/>               | <input type="checkbox"/>      | <input type="checkbox"/>      | <input type="checkbox"/>  | <input type="checkbox"/> | <input type="checkbox"/>         | <input type="checkbox"/> |
| Etanercept   | <input type="checkbox"/>               | <input type="checkbox"/>      | <input type="checkbox"/>      | <input type="checkbox"/>  | <input type="checkbox"/> | <input type="checkbox"/>         | <input type="checkbox"/> |
| Golimumab    | <input type="checkbox"/>               | <input type="checkbox"/>      | <input type="checkbox"/>      | <input type="checkbox"/>  | <input type="checkbox"/> | <input type="checkbox"/>         | <input type="checkbox"/> |
| Infliximab   | <input type="checkbox"/>               | <input type="checkbox"/>      | <input type="checkbox"/>      | <input type="checkbox"/>  | <input type="checkbox"/> | <input type="checkbox"/>         | <input type="checkbox"/> |
| Rituximab    | <input type="checkbox"/>               | <input type="checkbox"/>      | <input type="checkbox"/>      | <input type="checkbox"/>  | <input type="checkbox"/> | <input type="checkbox"/>         | <input type="checkbox"/> |
| Tocilizumab  | <input type="checkbox"/>               | <input type="checkbox"/>      | <input type="checkbox"/>      | <input type="checkbox"/>  | <input type="checkbox"/> | <input type="checkbox"/>         | <input type="checkbox"/> |
| Tofacitinib  | <input type="checkbox"/>               | <input type="checkbox"/>      | <input type="checkbox"/>      | <input type="checkbox"/>  | <input type="checkbox"/> | <input type="checkbox"/>         | <input type="checkbox"/> |
| Ustekinumab  | <input type="checkbox"/>               | <input type="checkbox"/>      | <input type="checkbox"/>      | <input type="checkbox"/>  | <input type="checkbox"/> | <input type="checkbox"/>         | <input type="checkbox"/> |

**21. Your inflammatory arthritis patient has a 6 week unplanned pregnancy and is still taking medications. How should the patient proceed?**

|              | Continue drug,<br>continue<br>pregnancy | Stop drug,<br>continue<br>pregnancy | Continue<br>drug, counsel<br>regarding<br>termination | Stop drug,<br>counsel<br>regarding<br>termination | Not sure |
|--------------|-----------------------------------------|-------------------------------------|-------------------------------------------------------|---------------------------------------------------|----------|
| Ibuprofen    | [ ]                                     | [ ]                                 | [ ]                                                   | [ ]                                               | [ ]      |
| Naproxen     | [ ]                                     | [ ]                                 | [ ]                                                   | [ ]                                               | [ ]      |
| Celecoxib    | [ ]                                     | [ ]                                 | [ ]                                                   | [ ]                                               | [ ]      |
| Other NSAIDs | [ ]                                     | [ ]                                 | [ ]                                                   | [ ]                                               | [ ]      |
| Prednisone   | [ ]                                     | [ ]                                 | [ ]                                                   | [ ]                                               | [ ]      |

**22. Your inflammatory arthritis patient has a 6 week unplanned pregnancy and is still taking her conventional DMARD. How should the patient proceed?**

|                          | Continue drug,<br>continue<br>pregnancy | Stop drug,<br>continue<br>pregnancy | Continue<br>drug, counsel<br>regarding<br>termination | Stop drug,<br>counsel<br>regarding<br>termination | Not sure |
|--------------------------|-----------------------------------------|-------------------------------------|-------------------------------------------------------|---------------------------------------------------|----------|
| Azathioprine             | [ ]                                     | [ ]                                 | [ ]                                                   | [ ]                                               | [ ]      |
| Chloroquine              | [ ]                                     | [ ]                                 | [ ]                                                   | [ ]                                               | [ ]      |
| Cyclophosphamide         | [ ]                                     | [ ]                                 | [ ]                                                   | [ ]                                               | [ ]      |
| Cyclosporine             | [ ]                                     | [ ]                                 | [ ]                                                   | [ ]                                               | [ ]      |
| Doxycycline              | [ ]                                     | [ ]                                 | [ ]                                                   | [ ]                                               | [ ]      |
| Gold Salts               | [ ]                                     | [ ]                                 | [ ]                                                   | [ ]                                               | [ ]      |
| Hydroxychloroquine       | [ ]                                     | [ ]                                 | [ ]                                                   | [ ]                                               | [ ]      |
| Leflunomide              | [ ]                                     | [ ]                                 | [ ]                                                   | [ ]                                               | [ ]      |
| Methotrexate             | [ ]                                     | [ ]                                 | [ ]                                                   | [ ]                                               | [ ]      |
| Minocycline              | [ ]                                     | [ ]                                 | [ ]                                                   | [ ]                                               | [ ]      |
| Mycophenolate<br>mofetil | [ ]                                     | [ ]                                 | [ ]                                                   | [ ]                                               | [ ]      |
| Sulfasalazine            | [ ]                                     | [ ]                                 | [ ]                                                   | [ ]                                               | [ ]      |

**23. Your inflammatory arthritis patient has a 6 week unplanned pregnancy and is still taking her biologic DMARD/small molecule. How should the patient proceed?**

|              | Continue drug,<br>continue<br>pregnancy | Stop drug,<br>continue<br>pregnancy | Continue<br>drug, counsel<br>regarding<br>termination | Stop drug,<br>counsel<br>regarding<br>termination | Not sure |
|--------------|-----------------------------------------|-------------------------------------|-------------------------------------------------------|---------------------------------------------------|----------|
| Abatacept    | [ ]                                     | [ ]                                 | [ ]                                                   | [ ]                                               | [ ]      |
| Adalimumab   | [ ]                                     | [ ]                                 | [ ]                                                   | [ ]                                               | [ ]      |
| Anakinra     | [ ]                                     | [ ]                                 | [ ]                                                   | [ ]                                               | [ ]      |
| Apremilast   | [ ]                                     | [ ]                                 | [ ]                                                   | [ ]                                               | [ ]      |
| Certolizumab | [ ]                                     | [ ]                                 | [ ]                                                   | [ ]                                               | [ ]      |
| Etanercept   | [ ]                                     | [ ]                                 | [ ]                                                   | [ ]                                               | [ ]      |
| Golimumab    | [ ]                                     | [ ]                                 | [ ]                                                   | [ ]                                               | [ ]      |
| Infliximab   | [ ]                                     | [ ]                                 | [ ]                                                   | [ ]                                               | [ ]      |
| Rituximab    | [ ]                                     | [ ]                                 | [ ]                                                   | [ ]                                               | [ ]      |
| Tocilizumab  | [ ]                                     | [ ]                                 | [ ]                                                   | [ ]                                               | [ ]      |
| Tofacitinib  | [ ]                                     | [ ]                                 | [ ]                                                   | [ ]                                               | [ ]      |
| Ustekinumab  | [ ]                                     | [ ]                                 | [ ]                                                   | [ ]                                               | [ ]      |

**24. What questions or issues about treating inflammatory arthritis patients in pregnancy have we missed or would you wish further guidance on?**
